# Supplementary material for: High-sensitivity long-range surface plasmon resonance sensing assisted by gold nanoring cavity arrays and nanocavity coupling
Source: Royal Society of Chemistry journal article supplement (doi:10.1039/d2cp05664j), 2023-01-01
Supplement: d2cp05664j1.pdf [file d2cp05664j1.pdf]

Electronic supplementary information

# High-Sensitivity Long-Range Surface Plasmon Resonance Sensing Assisted by Gold Nanoring Cavity Array and Nanocavity Coupling

Xiaojun Luo, Rui Tan, Qiuju Li, Jiaxin Chen, Yalin Xie, Jiayi Peng, Mei Zeng, Minghang Jiang\*,  
Caijun Wu\*, Yi He\*.

*School of Science, Xihua University, Chengdu 610039, P. R. China*

## Figures

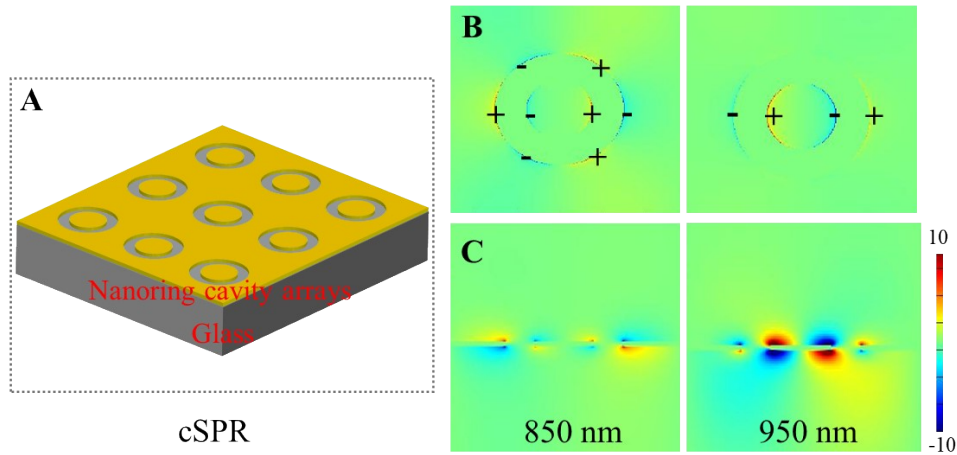

**Fig. S1** (A) 3D illustrations of conventional SPR (cSPR) substrate. (B) Charge distributions and (C) z component of the  $E$ -field ( $E_z$ -field) distributions of cSPR substrate at different resonance modes. The yellow and blue colors in B represent the positive and negative charges, respectively. The color bar in C represents  $(E_z/E_0)$ .

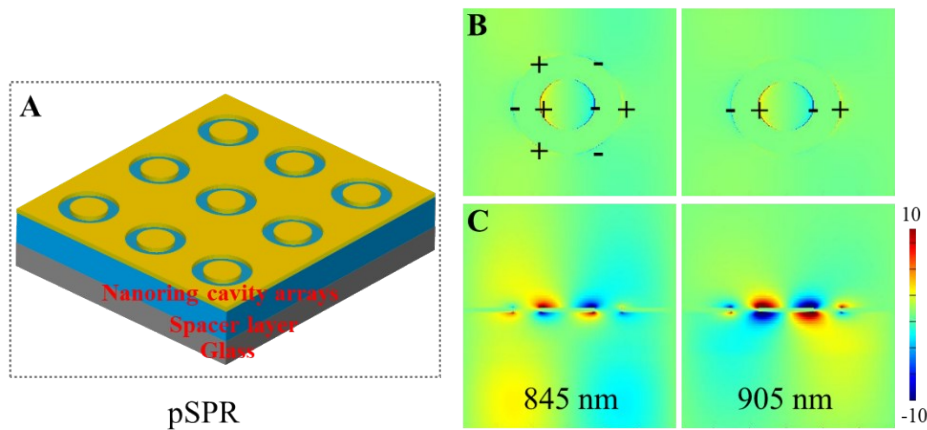

**Fig. S2** (A) 3D illustrations of pseudo SPR (pSPR) substrate. (B) Charge distributions and (C)  $E_z$ -field distributions of pSPR substrate at different resonance modes. The yellow and blue colors in B represent the positive and negative charges, respectively. The color bar in C represents  $(E_z/E_0)$ .

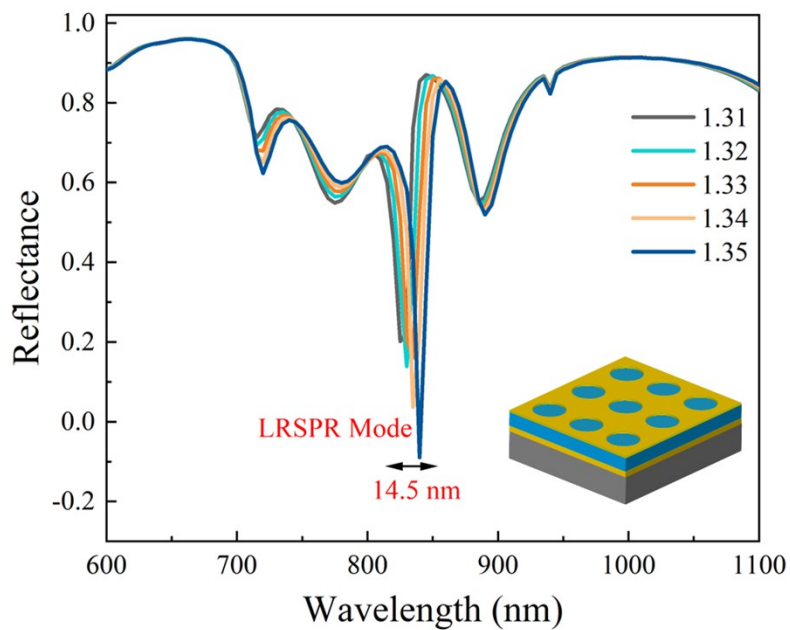

**Fig. S3** Reflectance spectra in a surrounding medium of RI varying from 1.31 to 1.35 of nanohole array-LRSPR substrate.

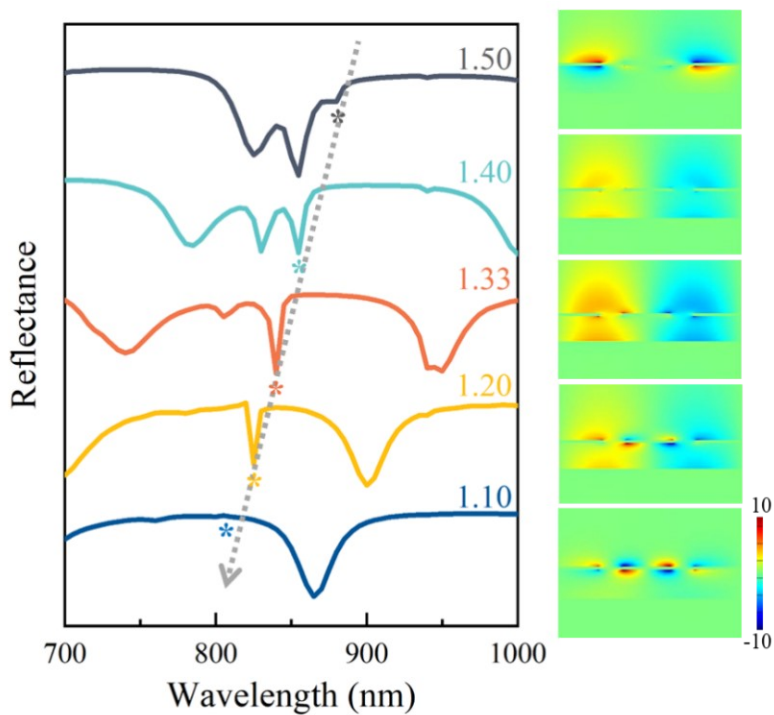

**Fig. S4** Reflectance spectra calculated of LRSPR substrate with different refractive indices of space layer and their corresponding  $E_z$ -field distributions at LRSPR Mode (marked with \*).

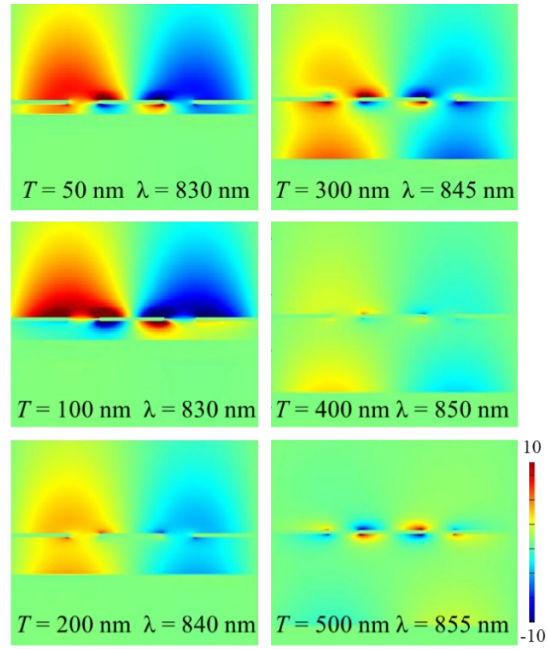

**Fig. S5**  $E_z$ -field distributions at LRSPR Mode of LRSPR substrate with increasing  $T$  from 50 to 500 nm.

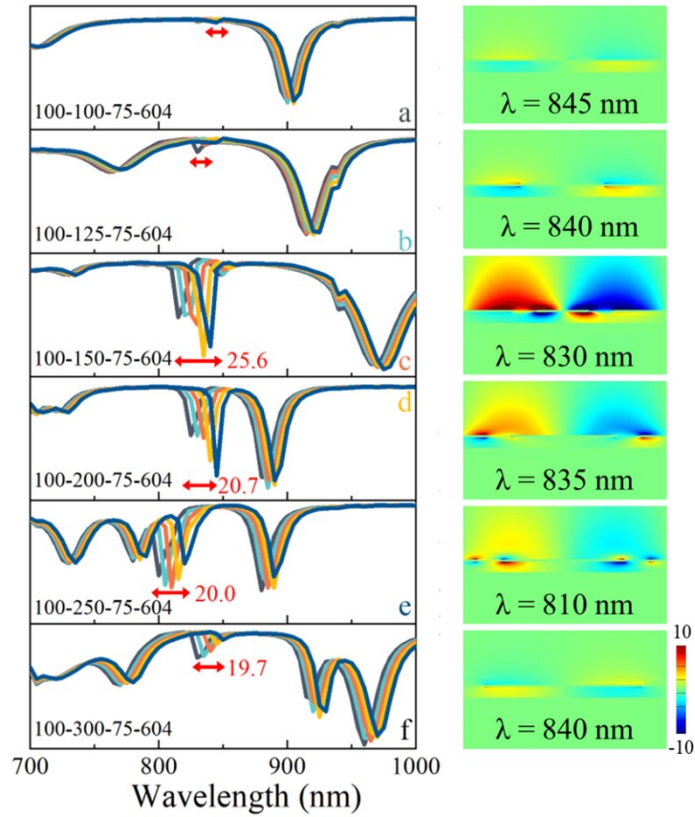

**Fig. S6** RI-dependent reflectance spectra and their corresponding  $E_z$ -field distributions at LRSPR Mode of LRSPR substrate with increasing  $S$  from 100 to 300 nm (a–f).

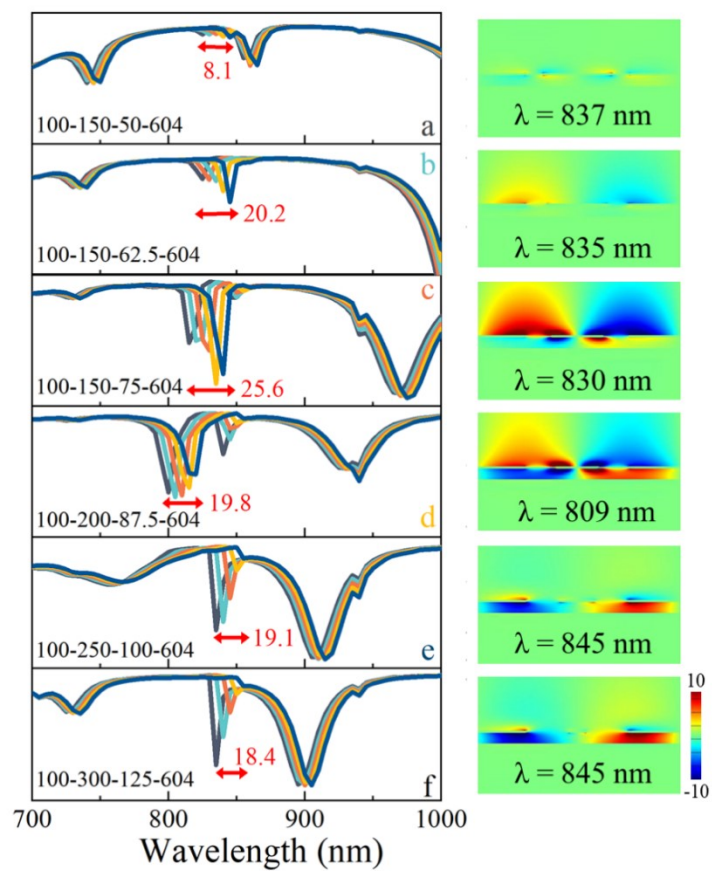

**Fig. S7** RI-dependent reflectance spectra and their corresponding  $E_z$ -field distributions of LRSPR substrate with increasing  $G$  from 50 to 125 nm (a–f).

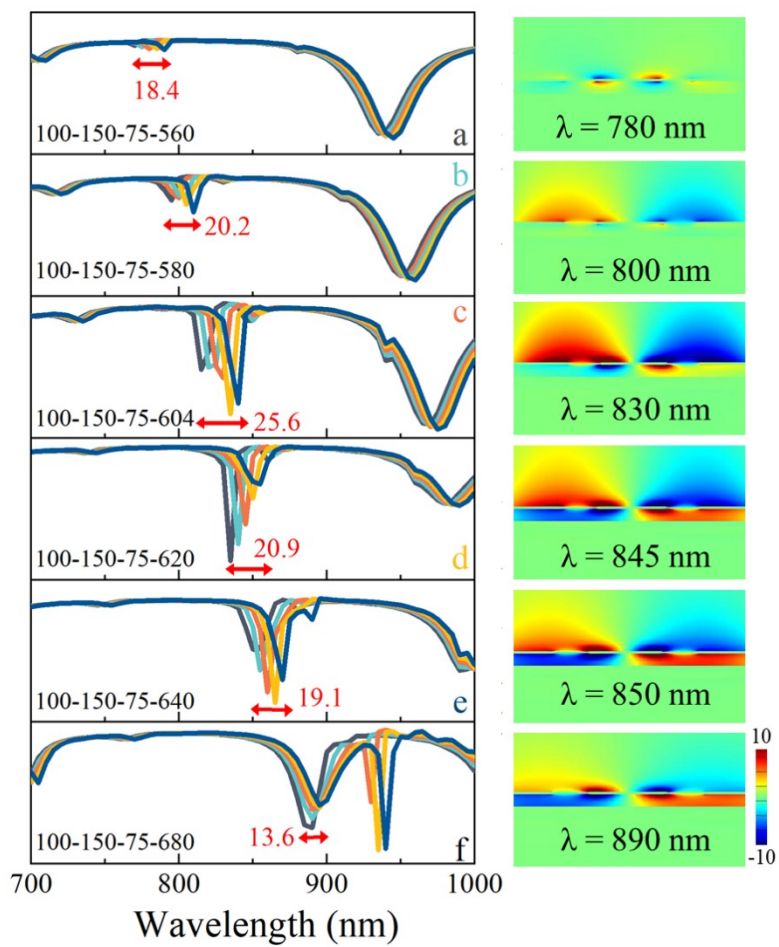

**Fig. S8** RI-dependent reflectance spectra and their corresponding  $E_z$ -field distributions of LRSPP substrate with increasing  $P$  from 560 to 680 nm (a–f).

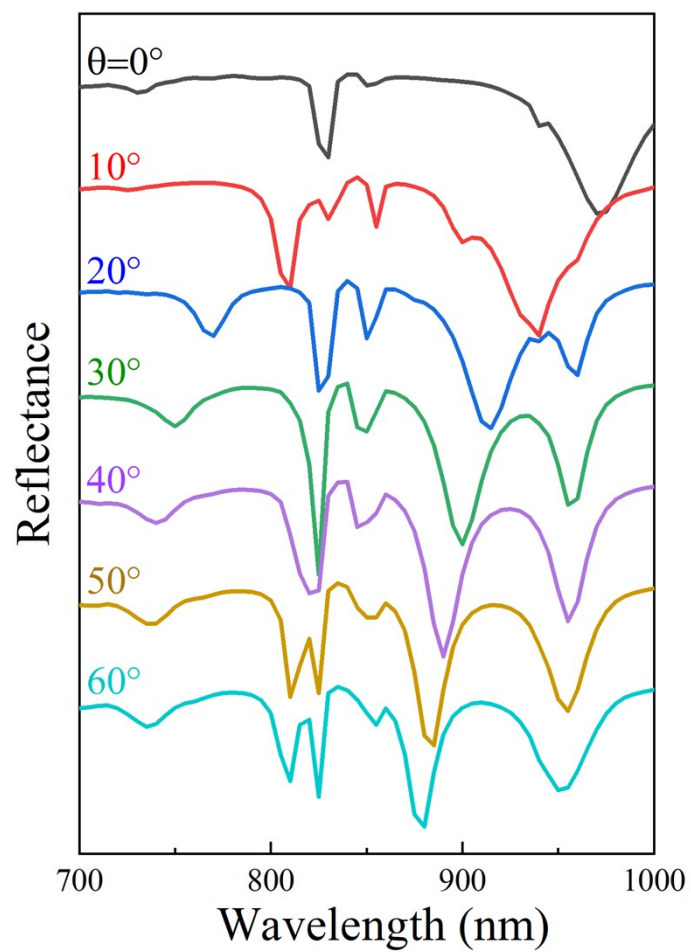

**Fig. S9** Reflectance spectra of LRSPR substrate with increasing  $\theta$  from 0 to  $60^\circ$ .

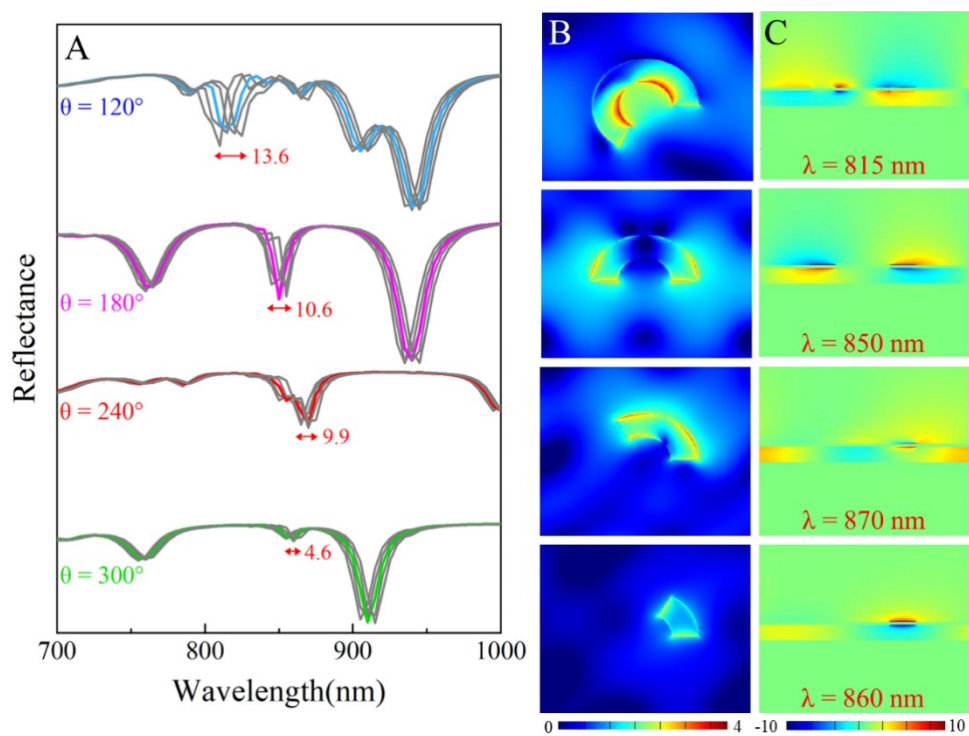

**Fig. S10** (A) RI-dependent reflectance spectra of LRSPR substrate with increasing  $\theta$  from 120 to 300°. (B and C) Corresponding  $E$ -field distributions at Au–water interfaces of the top NRCA and  $E_z$ -field distributions at the cross-sectional  $x-z$  plane of LRSPR substrates at different resonance modes.
